# Supplementary material for: Polygenic in vivo validation of cancer mutations using transposons
Source: PubMed Central journal article supplement (PMC4210617; doi:10.1186/s13059-014-0455-6), 2014-09-27
Supplement: 13059_2014_455_MOESM1_ESM.pdf [file 13059_2014_455_MOESM1_ESM.pdf]

Table S1. Tag sequences

| <b>cDNA</b>    | <b>Unique sequence tag</b>                                    |
|----------------|---------------------------------------------------------------|
| CDK2           | CGAGTGACTAGATACGCTATTCACACTGCGGAATTAGCGCCGCTAGTATTCGATATGGGT  |
| CDK2.P45L      | CTATGACGGAGCAGATACCGCCGTTAGTTAAGATTCTCGCAACTCGTCGTAAGGTAGCG   |
| DGKB           | AGTACACCCGACCAGTGAAGCCTAACTAGAGATATGCGTCACCTGTTAAGCAGGACTGAG  |
| DGKB.D592Y     | TCAGCTTCGATAGCCGAGGTGCCACGCTACTAAGTTTATCGGCTAGATTAACGTAAGTGC  |
| DGKB.G501S     | CCTCTAGGTGTACGGAGCTTTTTAGTCCGCGACGGGATCTGCGCATCGCAAATCCGAGAA  |
| DGKB.K704E     | GACGCGCTCGTAACTCATAGTTCATTGGACGCAGTCACGGCGAGTTAATCTCAGCGAACG  |
| DGKB.M111I     | GAGATCACTCGAACTTATCCGCGTGATAAGCATTCCGCGAGTATAGAGACGCACCCGAAGC |
| DGKB.P432S     | GGGACTCTAGTAGTATGCTTTTTCGGTACGCGATAGCAGCTACGCTATGAGGATTGATCGT |
| ERN1           | AATGTAGACTCACGCACGCGCCTGCCATCAATTCGATTAATACTCGTTAGCAGGTTTGG   |
| ERN1.S769F     | ATGAGACGGCTAGTACGCCTGACAGCGTTACAAGTACCTACGGATCTAACTACACTGTGC  |
| HCK            | TATGACCTCGCACTAGCGTGGACTACCTAATACGACGTGCTAGTTCCGGTACATTGCGCTG |
| HCK.D399G      | AGGTCAGACAGCATTTCGCTCACTACCGGCTACGACTTGGTACCCGAGCGTTGATAATTCT |
| ITK            | TCCAGTGGCTAAGTGTTCCGTATCCTCGGAGACGCGATTGTACGATCCGGCATGTCGATG  |
| ITK.P23L       | CACGTTTGCGAATAGGTATCGAGATCCACGCAATCGCATAACGATGCTTATAGACTCT    |
| LYN            | ATATCGACCATCCGCGTAAGATATTATCGGTGACGAGCGTACACGATGACAATGCCTGGA  |
| LYN.D385Y      | GCAGCTACTCGCACTGATTGAATCGGTAAGTTCGGTTCACGTCGTAAGTCTAGCTCGTT   |
| MAPK8          | GAGTGCATTACAGATTACCGAATCAGTATGAAGCGAGCGCACACCCGAGCCGATATTCGTG |
| MAPK8.G171S    | GTACGTGTCGGCACATCGTTATCGCAACTAACCGCGTATACAGTAGACCCGACTCGTTTG  |
| MAPK8.G177R    | CCTTGGACGGTATATGATGTACGCTTACGCGACTTTCGGTATCGGACCAGCAGGCTAAG   |
| MAPK9          | ATTAGCAGCGCCATTACGCGGTACACAGATACGCGCTCAGCAGCGACTGCAACTATTGTA  |
| MAPK9.K56N     | GGTTATATCACATCCTTCGCACTATCTATCGAGCGGGAGTATAGAAGTATAAGTGCGCCG  |
| MAPK9.V13M     | GGTACGAGATAAGTAGATCCGCTACATCGTAATTGTCCTCGCCGAGTGACAATAATTCA   |
| MGC42105       | GCCTCACTATTCACGTTATGCACTCGTAACTATACCGAAGACTGTACTACTCGCTCGATT  |
| MGC42105.P411T | TTAGCACGTAGAGCATTGCGACATCGGGTAAACGCCTCGAGGCTTAATCAAACCCGCTAA  |
| NTRK3          | GGCTTAACTATCACGATCAGGGCATAACGACAACGATTACAGCCCGCTAACGAAAGGGTAA |
| NTRK3.H677Y    | CTGTGCGCGAAAGCAACGAAAATGATAGGTAATCGGACCGCACGAATCGGAATTGACGTA  |
| NTRK3.R678Q    | TAATCCGCGACGAGCTGCTAGCTCATGTACGTGAGGAGCTATTTAGCGTGCAGCCGACCT  |
| p53.R270H      | GCGGCCTTAGGATTGATATTATCATGGTGGACATCGTTTGCCGTATAGCTTAATAGCCAG  |
| YSK4           | GCCCTAGCCCGGATTAGTTTCCGGTAACTTCGTATAAGAGCTAATGCGGTTTAAGCGATG  |
| YSK4.E21V      | CCTCTAAGCTCACGTTATAGGTACCCATCGGCACGTTTAGTTAACGCTGATGCACCGGCT  |

Table S2. Details of tumour bearing mice

| Mouse ID  | Generation  | Genotype                                        | Age at death (weeks) | Tumour type                        | Kinase alleles expressed in tumours                                                                                                                                                                                                             | ES cell ID <sup>1</sup> | Transposase in ES cells <sup>1</sup> |
|-----------|-------------|-------------------------------------------------|----------------------|------------------------------------|-------------------------------------------------------------------------------------------------------------------------------------------------------------------------------------------------------------------------------------------------|-------------------------|--------------------------------------|
| PLKB4.1b  | F0 chimaera | Transposase + Transposons                       | 112.8                | Lymphoma                           | CDK2.P45L. CDK2.P45L expression retained in primary cell line                                                                                                                                                                                   | TM201                   | PB                                   |
| PLKD1.1a  | F0 chimaera | Transposase + Transposons                       | 109.5                | Hepatocellular carcinoma           | LYN, ERN1                                                                                                                                                                                                                                       | TM402                   | PB                                   |
| PLKD3.1a  | F0 chimaera | Transposase + Transposons                       | 67.4                 | Hepatocellular carcinoma           | NTRK3                                                                                                                                                                                                                                           | TM402                   | PB                                   |
| PLKD4.1a  | F0 chimaera | Transposase + Transposons                       | 68.2                 | Hepatocellular carcinoma           | NTRK3, NTRK3.H677Y, MAPK8.G171S, LYN                                                                                                                                                                                                            | TM402                   | PB                                   |
| PLKE5.1a  | F0 chimaera | Transposase + Transposons                       | 99.5                 | Lymphoma, follicular               | YSK4, YSK4.E512V. Kinase cDNA expression lost in primary cell line                                                                                                                                                                              | TM401                   | SB100                                |
| PLKD3.1c  | F0 chimaera | Transposase + Transposons                       | 86.5                 | Lymphoma                           | None detected                                                                                                                                                                                                                                   | TM402                   | PB                                   |
| PLKB4.1a  | F0 chimaera | Transposase + Transposons                       | 84.5                 | Wilms tumour like                  | None detected                                                                                                                                                                                                                                   | TM402                   | PB                                   |
| PLKD7.1a  | F0 chimaera | Transposase + Transposons                       | 71.8                 | Atypical Lipoma                    | None detected                                                                                                                                                                                                                                   | TM402                   | PB                                   |
| PLKK6.1a  | F0 chimaera | Transposons only                                | 96.1                 | Lymphoma                           | Not done                                                                                                                                                                                                                                        | T24AC6                  |                                      |
| PLWG3.1c  | F0 chimaera | Transposons only                                | 89.9                 | Lymphoma                           | Not done                                                                                                                                                                                                                                        | T25ABE1                 |                                      |
| PLWG6.1b  | F0 chimaera | Transposons only                                | 85.5                 | Hepatocellular carcinoma           | Not done                                                                                                                                                                                                                                        | T24AC6                  |                                      |
| PLKH1.3c  | F1          | Transposase + Transposons                       | 67.4                 | B-cell Lymphoma                    | CDK2.P45L                                                                                                                                                                                                                                       | TM201                   | PB                                   |
| PLKL7.2c  | F1          | Transposase + Transposons                       | 67.6                 | Lymphoma                           | MGC42105, MGC42105.P411T, ITK, NTRK3, NTRK3.H677Y, MAPK8.G171S, LYN, YSK4, ERN1, ERN1.S768F                                                                                                                                                     | T24AC6                  |                                      |
| PLKH1.4b  | F1          | Transposase + Transposons                       | 104.6                | Lymphoma                           | CDK2.P45L. CDK2.P45L expression retained in cell line from primary tumour and secondary tumour                                                                                                                                                  | TM201                   | PB                                   |
| PLKJ2.1c  | F1          | Transposase + Transposons                       | 105.8                | Hepatocellular carcinoma           | NTRK3                                                                                                                                                                                                                                           | TM401                   | SB100                                |
| PLKH1.2c  | F1          | Transposase + Transposons                       | 117.4                | Burkitt-like lymphoma              | CDK2.P45L                                                                                                                                                                                                                                       | TM201                   | PB                                   |
| PLKH1.2d  | F1          | Transposase + Transposons                       | 117.6                | Lymphoma                           | CDK2.P45L. CDK2.P45L retained in secondary transplanted tumour                                                                                                                                                                                  | TM201                   | PB                                   |
| PLKJ1.1a  | F1          | Transposase + Transposons                       | 112.9                | Lymphoma                           | ERN1, ERN1.S768F                                                                                                                                                                                                                                | TM401                   | SB100                                |
| PLKL5.2b  | F1          | Transposase + Transposons                       | 87.1                 | Lymphoma                           | CDK2.P45L, HCK, HCKD378G, MGC42105, MGC42105.P411T, MAPK9, ITK, ITK.P23L, NTRK3.H677Y, MAPK8, MAPK8.G171S, MAPK8.G177R, LYN, ERN1, ERN1.S768F                                                                                                   | T24AF11                 |                                      |
| PLKH1.4c  | F1          | Transposase + Transposons                       | 125.1                | Lymphoma                           | CDK2.P45L                                                                                                                                                                                                                                       | TM201                   | PB                                   |
| PLKL5.2a  | F1          | Transposase + Transposons                       | 91.2                 | Lymphoma                           | CDK2, CDK2.P45L, HCK, HCK.D378G, MGC42105.P411T, MAPK9, ITK, ITK.P23L, NTRK3.H677Y, NTRK3.R678Q, MAPK8, MAPK8.G171S, MAPK8.G177R, LYN, ERN1.S768F                                                                                               | T24AF11                 |                                      |
| PLKL7.4d  | F1          | Transposase + Transposons                       | 90.5                 | Lung adenocarcinoma                | CDK2, CDK2.P45L, HCK.D378G, MGC42105, ITK, NTRK3, NTRK3.H677Y, MAPK8, MAPK8.G171S, YSK4.E512V                                                                                                                                                   | T24AC6                  |                                      |
| PLKL7.4c  | F1          | Transposase + Transposons                       | 93.9                 | Lymphoma                           | CDK2, CDK2.P45L, MGC42105.P411T, ITK, NTRK3, MAPK8, MAPK8.G171S, LYN, YSK4.E512V, ERN1.S768F                                                                                                                                                    | T24AC6                  |                                      |
| PLKL7.4a  | F1          | Transposase + Transposons                       | 94.1                 | Lymphoma                           | CDK2.P45L, MGC42105.P411T, MAPK9, ITK, NTRK3, NTRK3.H677Y, MAPK8, YSK4.E512V, ERN1, ERN1.S768F                                                                                                                                                  | T24AC6                  |                                      |
| PLKJ1.1c  | F1          | Transposase + Transposons                       | 122.9                | Hepatocellular carcinoma           | MAPK8.G177R                                                                                                                                                                                                                                     | TM401                   | SB100                                |
| PLKL5.1a  | F1          | Transposase + Transposons                       | 109.4                | Lymphoma                           | CDK2, CDK2.P45L, HCK.D378G, MGC42105, MAPK8.G171S, MAPK8.G177R, YSK4, ERN1, ERN1.S768F. Derived cell line retains expression of CDK2, CDK2.P45L, HCK.D378G, MGC42105, MAPK8.G171S, MAPK8.G177R, YSK4, ERN1, ERN1.S768F                          | T24AF11                 |                                      |
| PLKJ2.2h  | F1          | Transposase + Transposons                       | 69.4                 | Lymphoma                           | None detected                                                                                                                                                                                                                                   | TM401                   | SB100                                |
| PLKG2.1f  | F1          | Transposase + Transposons                       | 127.4                | Primitive neuroectodermal tumor    | None detected                                                                                                                                                                                                                                   | TM301                   | PB                                   |
| PLKJ2.2a  | F1          | Transposase + Transposons                       | 106.1                | Lung adenocarcinoma                | None detected                                                                                                                                                                                                                                   | TM401                   | SB100                                |
| PLUD1.1h  | F1          | Transposase + Transposons                       | 82.8                 | Lymphoma                           | None detected                                                                                                                                                                                                                                   | TM401                   | SB100                                |
| PLKJ2.1b  | F1          | Transposase + Transposons                       | 80.2                 | Mucoepidermoid carcinoma           | None detected                                                                                                                                                                                                                                   | TM401                   | SB100                                |
| PLKH1.2b  | F1          | Transposase + Transposons                       | 117.6                | Angiosarcoma                       | None detected                                                                                                                                                                                                                                   | TM201                   | PB                                   |
| PLKG2.1a  | F1          | Transposase + Transposons                       | 115.9                | Lymphoma                           | None detected                                                                                                                                                                                                                                   | TM301                   | PB                                   |
| PLKJ1.3d  | F1          | Transposase + Transposons                       | 109.2                | Liver angiosarcoma.                | None detected                                                                                                                                                                                                                                   | TM401                   | SB100                                |
| PLKJ1.4a  | F1          | Transposase + Transposons                       | 107.5                | Hepatocellular carcinoma           | None detected                                                                                                                                                                                                                                   | TM401                   | SB100                                |
| PLKH1.2a  | F1          | Transposase + Transposons                       | 130.4                | Hepatocellular carcinoma           | None detected                                                                                                                                                                                                                                   | TM201                   | PB                                   |
| PLKJ2.2d  | F1          | Transposase + Transposons                       | 100.4                | None detected                      | None detected                                                                                                                                                                                                                                   | TM401                   | SB100                                |
| PLUD1.1c  | F1          | Transposase + Transposons                       | 121.2                | Lung papillary carcinoma           | None detected                                                                                                                                                                                                                                   | TM401                   | SB100                                |
| PLKJ2.2f  | F1          | Transposase + Transposons                       | 114.9                | Adenocarcinoma                     | None detected                                                                                                                                                                                                                                   | TM401                   | SB100                                |
| PLKJ1.3g  | F1          | Transposase + Transposons                       | 115.4                | Carcinoma, lymphoma.               | None detected                                                                                                                                                                                                                                   | TM401                   | SB100                                |
| PLKH1.5a  | F1          | Transposase + Transposons                       | 96.8                 | Lymphoma                           | None detected                                                                                                                                                                                                                                   | TM201                   | PB                                   |
| PLUD1.1f  | F1          | Transposase + Transposons                       | 96.5                 | Ovarian serous papillary carcinoma | Not done                                                                                                                                                                                                                                        | TM401                   | SB100                                |
| PLKG2.1g  | F1          | Transposase + Transposons                       | 122.1                | Lymphoplasmacytic lymphoma         | Not done                                                                                                                                                                                                                                        | TM301                   | PB                                   |
| PLKL5.2c  | F1          | Transposase + Transposons                       | 98.4                 | Lymphoma                           | Not done                                                                                                                                                                                                                                        | T24AF11                 |                                      |
| PLKL7.2a  | F1          | Transposase + Transposons                       | 97.8                 | Lymphoma                           | Not done                                                                                                                                                                                                                                        | T24AC6                  |                                      |
| PLKJ1.1e  | F1          | Transposase + Transposons                       | 115.1                | Lymphoma                           | Not done                                                                                                                                                                                                                                        | TM401                   | SB100                                |
| PLKL7.1d  | F1          | Transposase + Transposons                       | 68.5                 | Lymphoma                           | Not done                                                                                                                                                                                                                                        | T24AC6                  |                                      |
| PLKG2.1e  | F1          | Transposase + Transposons                       | 109.2                | Lymphoma                           | Not done                                                                                                                                                                                                                                        | TM301                   | PB                                   |
| PLUD2.1a  | F1          | Transposase + Transposons                       | 135.8                | Lymphoma                           | Not done                                                                                                                                                                                                                                        | TM401                   | SB100                                |
| PLKL7.2b  | F1          | Transposase + Transposons                       | 69.6                 | Lymphoma                           | Not done                                                                                                                                                                                                                                        | T24AC6                  |                                      |
| PLKL7.1b  | F1          | Transposase + Transposons                       | 72.8                 | Harderian gland adenoma            | Not done                                                                                                                                                                                                                                        | T24AC6                  |                                      |
| PLKJ2.1h  | F1          | Transposase + Transposons                       | 111.6                | Lymphoma                           | Not done                                                                                                                                                                                                                                        | TM401                   | SB100                                |
| PLKJ2.2c  | F1          | Transposase + Transposons                       | 125.4                | Lymphoma                           | Not done                                                                                                                                                                                                                                        | TM401                   | SB100                                |
| PLKL7.4b  | F1          | Transposase + Transposons                       | 91.5                 | Hepatocellular carcinoma           | Not done                                                                                                                                                                                                                                        | T24AC6                  |                                      |
| PLKJ1.4e  | F1          | Transposase + Transposons                       | 124.8                | Lymphoma                           | Not done                                                                                                                                                                                                                                        | TM401                   | SB100                                |
| PLKP25.1e | F1          | Transposase + Transposons                       | 61.8                 | Hepatocellular carcinoma           | CDK2, CDK2.P45L, HCK, ITK, NTRK3, NTRK3.R678Q, MAPK8, MAPK8.G171S, MAPK8.G177R, LYN, YSK4, YSK4.E512V, ERN1, ERN1.S768F, P53.R270H                                                                                                              | T25BBD9                 |                                      |
| PLKP13.1b | F1          | Transposase + Transposons (including p53.R270H) | 69.1                 | Adenoid cystic carcinoma           | CDK2.P45L, HCK, HCK.D378G, MGC42105.P411T, NTRK3.R678Q, MAPK8, MAPK8.G171S, LYN, ERN1.S768F and p53.R270H. Primary cell line expresses CDK2.P45L, HCK, HCK.D378G, MGC42105.P411T, MAPK9.V13M, NTRK3, MAPK8, MAPK8.G177R, ERN1.S768F, p53.R270H. | T25ABE10                |                                      |

|           |             |                                                 |       |                                 |                                                                                                                               |         |  |
|-----------|-------------|-------------------------------------------------|-------|---------------------------------|-------------------------------------------------------------------------------------------------------------------------------|---------|--|
| PLKP3.4h  | F1          | Transposase + Transposons (including p53.R270H) | 72.9  | Lung adenocarcinoma             | CDK2.P45L, MAPK9, LYN, ERN1.S768F                                                                                             | T25ABE1 |  |
| PLKP3.3a  | F1          | Transposase + Transposons (including p53.R270H) | 79.2  | Hepatocellular carcinoma        | CDK2, CDK2.P45L, HCK, HCK.D378G, MGC42105.P411T, MAPK9.K56N, ITK, ITK.P23L, NTRK3, MAPK8, MAPK8.G177R, YSK4, ERN1, ERN1.S768F | T25ABE1 |  |
| PLKP7.2b  | F1          | Transposase + Transposons (including p53.R270H) | 83.5  | Lymphoma                        | CDK2, CDK2.P45L, HCK.D378G, ITK, LYN, YSK4, ERN1, ERN1.S768F                                                                  | T25BBD9 |  |
| PLKP24.2b | F1          | Transposase + Transposons (including p53.R270H) | 76.8  | Hepatocellular carcinoma        | HCK, HCK.D378G, LYN, ERN1                                                                                                     | T25BBD9 |  |
| PLDG23.1d | F1          | Transposase + Transposons                       | 81.9  | Lymphoma                        | DGKB                                                                                                                          | DG1C5   |  |
| PLDG19.1e | F1          | Transposase + Transposons                       | 114.8 | Lymphoma                        | DGKB. DGKB expression retained in primary cell line                                                                           | DG2D3   |  |
| PLDG19.1b | F1          | Transposase + Transposons                       | 115   | Hepatocellular carcinoma        | DGKB                                                                                                                          | DG2D3   |  |
| PLDG19.1d | F1          | Transposase + Transposons                       | 116.9 | Diffuse large B-Cell lymphoma   | DGKB                                                                                                                          | DG2D3   |  |
| PLDG37.1a | F1          | Transposase + Transposons                       | 47.6  | Primitive neuroectodermal tumor | DGKB                                                                                                                          | DGJA8   |  |
| PLDG19.1f | F1          | Transposase + Transposons                       | 121.4 | Lymphoma                        | DGKB                                                                                                                          | DG2D3   |  |
| PLDG8.1a  | F0 chimaera | Transposase + Transposons                       | 57.6  | Sarcoma                         | DGKB.D592Y, DGKB.G501S, DGKB.P432S                                                                                            | DG1C5   |  |
| PLDG17.1e | F1          | Transposase + Transposons                       | 111.4 | Leiomyosarcoma                  | None detected                                                                                                                 | DG2D3   |  |
| PLDG23.1f | F1          | Transposase + Transposons                       | 86.4  | Lymphoma                        | Not done                                                                                                                      | DG1C5   |  |
| PLDG19.1a | F1          | Transposase + Transposons                       | 102.8 | Lymphoma                        | Not done                                                                                                                      | DG2D3   |  |
| PLDG19.1g | F1          | Transposase + Transposons                       | 102.8 | Lymphoma, glioblastoma          | Not done                                                                                                                      | DG2D3   |  |
| PLDG17.1b | F1          | Transposase + Transposons                       | 105.5 | Lung adenocarcinoma             | Not done                                                                                                                      | DG2D3   |  |

1. Kinase alleles (and transposase, if present) represented in the ES cells used to generate the original founder F0 animals are as follows

TM201 Rosa26-PBase CDK2, CDK2p.P45L, HCK, HCKp.D378G, MGC42105, MGC42105p.P411T  
TM301 Rosa26-PBase MAPK9, MAPK9p.V13M, MAPK9p.K56N, ITK, ITKp.P23L  
TM401 Rosa26-SB100 NTRK3, NTRK3.H677Y, NTRK3.R678Q, MAPK8, MAPK8.G171S, MAPK8.G177R, LYN, LYN.D385Y, YSK4, YSK4.E512V, ERN1, ERN1.S769F  
TM402 Rosa26-PBase NTRK3, NTRK3.H677Y, NTRK3.R678Q, MAPK8, MAPK8.G171S, MAPK8.G177R, LYN, LYN.D385Y, YSK4, YSK4.E512V, ERN1, ERN1.S769F  
T24AC6 CDK2, CDK2.P45L, HCK, HCK.D378G, MGC42105, MGC42105.P411T, MAPK9, MAPK9.V13M, ITK, NTRK3, NTRK3.H677Y, MAPK8, MAPK8.G171S, MAPK8.G177R, LYN, YSK4.E512V, ERN1, ERN1.S768F  
T24AF11 CDK2, CDK2.P45L, HCK, HCK.D378G, MGC42105, MGC42105.P411T, MAPK9.V13M, ITK, ITK.P23L, NTRK3, NTRK3.H677Y, NTRK3.R678Q, MAPK8, MAPK8.G171S, MAPK8.G177R, LYN, YSK4, ERN1.S768F  
T25ABE1 CDK2, CDK2.P45L, HCK, HCK.D378G, MGC42105, MGC42105.P411T, MAPK9.V13M, MAPK9.K56N, ITK, ITK.P23L, NTRK3, NTRK3.R678Q, MAPK8, MAPK8.G171S, MAPK8.G177R, LYN, LYN.D385Y, YSK4, YSK4.E512V, ERN1, ERN1.S768F  
T25ABE10 CDK2, CDK2.P45L, HCK, HCK.D378G, MGC42105.P411T, MAPK9.V13M, MAPK9.K56N, ITK, NTRK3, NTRK3.R678Q, MAPK8, MAPK8.G171S, LYN, YSK4, ERN1, ERN1.S768F  
T25BBD9 CDK2, CDK2.P45L, HCK.D378G, MGC42105.P411T, MAPK9, MAPK9.K56N, ITK, ITK.P23L, NTRK3.H677Y, MAPK8, MAPK8.G171S, LYN, YSK4, ERN1, ERN1.S768F  
DG1C5 DGKB, DGKB.D592Y, DGKB.M1111, DGKB.P432S, DGKB.G501S, DGKB.K704E  
DG2D3 DGKB, DGKB.D592Y, DGKB.M1111, DGKB.P432S, DGKB.G501S, DGKB.K704E  
DGJA8 DGKB, DGKB.D592Y, DGKB.G501S, DGKB.K704E

Table S3. Validated mutations from animal PLKB4.1b

| Sample ID | Variant ID | Chromosome | Position  | WT | Mut | Change | Ensembl gene ID    | Gene name     | Description   | Mutation consequence |
|-----------|------------|------------|-----------|----|-----|--------|--------------------|---------------|---------------|----------------------|
| PLKB4.1b3 | 39392547   | 1          | 19094468  | C  | G   |        | ENSMUSG00000042596 | Tfap2d        | p.S21R        | Missense             |
| PLKB4.1b3 | 39392640   | 1          | 58351208  | G  | A   |        | ENSMUSG00000079554 | Aox3l1        | p.A247T       | Missense             |
| PLKB4.1b3 | 39392646   | 1          | 59042200  | A  | C   |        | ENSMUSG00000026027 | Stradb        | p.D54A        | Missense             |
| PLKB4.1b3 | 39392101   | 1          | 82285966  | C  | t   |        | ENSMUSG00000055980 | Irs1          | p.R368H       | Missense             |
| PLKB4.1b3 | 39392564   | 1          | 113756251 | A  | C   |        | ENSMUSG00000038702 | Dsel          | p.Y1044D      | Missense             |
| PLKB4.1b3 | 39392883   | 1          | 174149628 | T  | C   |        | ENSMUSG00000007122 | Casq1         | p.E59G        | Missense             |
| PLKB4.1b3 | 39399659   | 2          | 26881500  | C  | T   |        | ENSMUSG00000036067 | Slc2a6        | p.G127D       | Missense             |
| PLKB4.1b3 | 39399882   | 2          | 34868531  | G  | A   |        | ENSMUSG00000026874 | Hc            | p.A1076V      | Missense             |
| PLKB4.1b3 | 39399905   | 2          | 40716207  | C  | T   |        | ENSMUSG00000049252 | Lrp1b         | p.R3100H      | Missense             |
| PLKB4.1b3 | 39399393   | 2          | 52578993  | T  | G   |        | ENSMUSG00000055371 | Stam2         | p.K48N        | Missense             |
| PLKB4.1b3 | 39399941   | 2          | 86349512  | T  | G   |        | ENSMUSG00000060742 | Olfir1076     | p.Y299D       | Missense             |
| PLKB4.1b3 | 39399943   | 2          | 86517195  | C  | G   |        | ENSMUSG00000075175 | Olfir1086     | p.Q98H        | Missense             |
| PLKB4.1b3 | 39399431   | 2          | 88586532  | A  | G   |        | ENSMUSG00000075117 | Olfir1198     | p.I171T       | Missense             |
| PLKB4.1b3 | 39399440   | 2          | 91823486  | T  | G   |        | ENSMUSG00000027230 | Creb3l1       | p.K454N       | Missense             |
| PLKB4.1b3 | 39399358   | 2          | 910571699 | C  | T   |        | ENSMUSG00000050808 | Muc15         | p.P108S       | Missense             |
| PLKB4.1b3 | 153047091  | 2          | 136372637 |    | G   |        | ENSMUSG00000074771 | Ankrd5        | p.G262fs*9    | Frameshift deletion  |
| PLKB4.1b3 | 39400004   | 2          | 174253467 | A  | G   |        | ENSMUSG00000016256 | Ctsz          | p.M276T       | Missense             |
| PLKB4.1b3 | 39393742   | 3          | 38856044  | G  | C   |        | ENSMUSG00000046743 | Fat4          | p.V2124L      | Missense             |
| PLKB4.1b3 | 39393985   | 3          | 72854701  | T  | C   |        | ENSMUSG00000048304 | Slitrk3       | p.H220R       | Missense             |
| PLKB4.1b3 | 39394029   | 3          | 97951233  | T  | G   |        | ENSMUSG00000027878 | Notch2        | p.S2403A      | Missense             |
| PLKB4.1b3 | 39394695   | 4          | 14902332  | T  | C   |        | ENSMUSG00000040536 | Necab1        | p.D232G       | Missense             |
| PLKB4.1b3 | 39394754   | 4          | 104712702 | T  | G   |        | ENSMUSG00000028518 | Prkaa2        | p.E306D       | Missense             |
| PLKB4.1b3 | 153045946  | 4          | 135999157 |    | CA  |        | ENSMUSG00000070687 | Htr1d         | p.T264fs*16   | Frameshift deletion  |
| PLKB4.1b3 | 39395392   | 5          | 4099235   | T  | C   |        | ENSMUSG00000001467 | Cyp5l1        | p.E214G       | Missense             |
| PLKB4.1b3 | 39396440   | 6          | 41721935  | T  | C   |        | ENSMUSG00000045479 | Olfir459      | p.D121G       | Missense             |
| PLKB4.1b3 | 39396797   | 6          | 54996424  | A  | C   |        | ENSMUSG00000029777 | Gars          | p.K70T        | Missense             |
| PLKB4.1b3 | 39396799   | 6          | 55228153  | A  | G   |        | ENSMUSG00000038022 | Fam188b       | p.D511G       | Missense             |
| PLKB4.1b3 | 39396812   | 6          | 56907279  | A  | C   |        | ENSMUSG00000071893 | Vmn1r4        | p.D258A       | Missense             |
| PLKB4.1b3 | 153058596  | 6          | 125121921 |    | C   |        | ENSMUSG00000038252 | Ncapd2        | p.A976fs*4    | Frameshift insertion |
| PLKB4.1b3 | 39396740   | 6          | 132907367 | T  | A   |        | ENSMUSG00000057699 | Tas2r13l1     | p.K166*       | Nonsense             |
| PLKB4.1b3 | 39398882   | 7          | 17740146  | G  | T   |        | ENSMUSG00000053228 | Ceacam3       | p.E169*       | Nonsense             |
| PLKB4.1b3 | 39398587   | 7          | 25917455  | A  | C   |        | ENSMUSG00000008496 | Pou2f2        | p.M6R         | Missense             |
| PLKB4.1b3 | 39398761   | 7          | 50915345  | C  | T   |        | ENSMUSG00000030474 | Siglece       | p.R53K        | Missense             |
| PLKB4.1b3 | 39398773   | 7          | 51784776  | C  | A   |        | ENSMUSG00000008193 | Spib          | p.C100F       | Missense             |
| PLKB4.1b3 | 39398774   | 7          | 51784853  | T  | C   |        | ENSMUSG00000008193 | Spib          | p.N84D        | Missense             |
| PLKB4.1b3 | 39398402   | 7          | 70244531  | C  | T   |        | ENSMUSG00000030525 | Chra7         | p.R363H       | Missense             |
| PLKB4.1b3 | 39399122   | 7          | 110076706 | G  | A   |        | ENSMUSG00000073963 | Olfir572      | p.R188H       | Missense             |
| PLKB4.1b3 | 39399000   | 7          | 137321263 | G  | A   |        | ENSMUSG00000030849 | Fgfr2         | p.Q616*       | Nonsense             |
| PLKB4.1b3 | 39389805   | 8          | 14822586  | G  | A   |        | ENSMUSG00000047495 | Dlgap2        | p.R689H       | Missense             |
| PLKB4.1b3 | 39390082   | 8          | 28519809  | G  | A   |        | ENSMUSG00000031491 | Chra6         | p.R87C        | Missense             |
| PLKB4.1b3 | 39390016   | 8          | 53282407  | A  | G   |        | ENSMUSG00000052825 | Gm9892        | p.S2P         | Missense             |
| PLKB4.1b3 | 39389967   | 8          | 88164565  | T  | C   |        | ENSMUSG00000036902 | Neto2         | p.Y511C       | Missense             |
| PLKB4.1b3 | 153050793  | 8          | 111774830 |    | A   |        | ENSMUSG00000057387 | 4922502B01Rik | p.L201fs?     | Frameshift deletion  |
| PLKB4.1b3 | 39400168   | 9          | 36342022  | G  | A   |        | ENSMUSG00000074448 | Gm5615        | p.H73Y        | Missense             |
| PLKB4.1b3 | 39400187   | 9          | 38635654  | A  | G   |        | ENSMUSG00000044798 | Olfir923      | p.Y126C       | Missense             |
| PLKB4.1b3 | 153052237  | 9          | 39509846  |    | G   |        | ENSMUSG00000066121 | Olfir149      | p.D171fs*2    | Frameshift deletion  |
| PLKB4.1b3 | 39400141   | 9          | 53181593  | C  | T   |        | ENSMUSG00000034584 | Exph5         | p.T623I       | Missense             |
| PLKB4.1b3 | 39400249   | 9          | 73780833  | A  | C   |        | ENSMUSG00000062151 | Unc13c        | p.L181R       | Missense             |
| PLKB4.1b3 | 39400687   | 9          | 108016984 | T  | G   |        | ENSMUSG00000032589 | Bsn           | p.Q1300P      | Missense             |
| PLKB4.1b3 | 39388747   | 10         | 23720702  | G  | T   |        | ENSMUSG00000069705 | Taar7b        | p.A320S       | Missense             |
| PLKB4.1b3 | 39388755   | 10         | 26844287  | C  | A   |        | ENSMUSG00000019899 | Lama2         | p.V1682F      | Missense             |
| PLKB4.1b3 | 153047852  | 11         | 53584794  |    | C   |        | ENSMUSG00000018899 | Irf1          | p.P2fs*7      | Frameshift deletion  |
| PLKB4.1b3 | 153047857  | 11         | 55086649  |    | C   |        | ENSMUSG00000055333 | Fat2          | p.G3094fs*8   | Frameshift deletion  |
| PLKB4.1b3 | 39396236   | 11         | 60310491  | G  | A   |        | ENSMUSG00000042678 | Myo15         | p.H73Y        | Missense             |
| PLKB4.1b3 | 153048037  | 11         | 77728486  |    | G   |        | ENSMUSG00000055045 | Gm1190        | p.P41fs*23    | Frameshift deletion  |
| PLKB4.1b3 | 39396051   | 11         | 87381186  | G  | A   |        | ENSMUSG00000020486 | Sept4         | p.A295T       | Missense             |
| PLKB4.1b3 | 39396073   | 11         | 90499631  | T  | G   |        | ENSMUSG00000020544 | Cox11         | p.L43R        | Missense             |
| PLKB4.1b3 | 39396325   | 11         | 98338239  | A  | T   |        | ENSMUSG00000018168 | Ikzf3         | c.823+2T>A    | Essential splice     |
| PLKB4.1b3 | 39396326   | 11         | 98338271  | G  | A   |        | ENSMUSG00000018168 | Ikzf3         | p.R265*       | Nonsense             |
| PLKB4.1b3 | 39397983   | 13         | 23647205  | C  | t   |        | ENSMUSG00000052565 | Hist1h1d      | p.L83F        | Missense             |
| PLKB4.1b3 | 39398122   | 13         | 117814035 | A  | t   |        | ENSMUSG00000021725 | Parp8         | p.D52E        | Missense             |
| PLKB4.1b3 | 39397413   | 14         | 52740237  | C  | G   |        | ENSMUSG00000057132 | Rpgrip1       | p.P182A       | Missense             |
| PLKB4.1b3 | 153044814  | 15         | 30548984  |    | GAG |        | ENSMUSG00000022240 | Ctndd2        | p.A98_E99insG | Inframe codon gain   |
| PLKB4.1b3 | 39393130   | 15         | 79725919  | G  | C   |        | ENSMUSG00000009585 | Apobec3       | p.L44F        | Missense             |
| PLKB4.1b3 | 39393131   | 15         | 79725921  | G  | T   |        | ENSMUSG00000009585 | Apobec3       | p.C45F        | Missense             |
| PLKB4.1b3 | 39393141   | 15         | 80875717  | A  | T   |        | ENSMUSG00000042292 | Mkl1          | c.112+2T>A    | Essential splice     |
| PLKB4.1b3 | 153044906  | 15         | 85861442  |    | G   |        | ENSMUSG00000016028 | Celsr1        | p.S923fs*13   | Frameshift insertion |
| PLKB4.1b3 | 39393309   | 15         | 99611366  | C  | T   |        | ENSMUSG00000023022 | Lima1         | p.A382T       | Missense             |
| PLKB4.1b3 | 39393031   | 15         | 102260492 | A  | T   |        | ENSMUSG00000001280 | Sp1           | p.H648L       | Missense             |
| PLKB4.1b3 | 39393032   | 15         | 102260573 | A  | G   |        | ENSMUSG00000001280 | Sp1           | p.K675R       | Missense             |
| PLKB4.1b3 | 39393586   | 16         | 18252558  | G  | A   |        | ENSMUSG00000022721 | Trmt2a        | p.A464T       | Missense             |
| PLKB4.1b3 | 39393632   | 16         | 19982838  | T  | C   |        | ENSMUSG00000043008 | Kihl6         | p.E71G        | Missense             |
| PLKB4.1b3 | 39393633   | 16         | 19982853  | C  | G   |        | ENSMUSG00000043008 | Kihl6         | p.C66S        | Missense             |
| PLKB4.1b3 | 39393634   | 16         | 19982869  | T  | G   |        | ENSMUSG00000043008 | Kihl6         | p.T61P        | Missense             |
| PLKB4.1b3 | 39393493   | 16         | 45610678  | G  | A   |        | ENSMUSG00000022659 | Gcet2         | c.29+5G>A     | Essential splice     |
| PLKB4.1b3 | 153057770  | 17         | 12895130  |    | C   |        | ENSMUSG00000023830 | Igf2r         | p.D1310fs*5   | Frameshift insertion |
| PLKB4.1b3 | 39391731   | 17         | 29628713  | G  | C   |        | ENSMUSG00000024014 | Pim1          | p.S199T       | Missense             |
| PLKB4.1b3 | 39391742   | 17         | 31061604  | G  | A   |        | ENSMUSG00000024027 | Glp1r         | p.G66+5G>A    | Essential splice     |
| PLKB4.1b3 | 39391749   | 17         | 31740200  | C  | T   |        | ENSMUSG00000006705 | Pknx1         | p.T332M       | Missense             |
| PLKB4.1b3 | 39391769   | 17         | 34200375  | A  | C   |        | ENSMUSG00000024330 | Col11a2       | p.L1369L      | Missense             |
| PLKB4.1b3 | 39391350   | 17         | 35148237  | T  | G   |        | ENSMUSG00000007029 | Vars          | p.C478G       | Missense             |
| PLKB4.1b3 | 39391357   | 17         | 35332049  | A  | G   |        | ENSMUSG00000024399 | Ltb           | p.K73E        | Missense             |
| PLKB4.1b3 | 39391358   | 17         | 35332079  | A  | G   |        | ENSMUSG00000024399 | Ltb           | p.S83G        | Missense             |
| PLKB4.1b3 | 39391388   | 17         | 36462099  | C  | T   |        | ENSMUSG00000024448 | H2-M10.1      | p.A174T       | Missense             |
| PLKB4.1b3 | 39391307   | 17         | 46967012  | A  | T   |        | ENSMUSG00000036568 | BC032203      | c.90+2T>A     | Essential splice     |
| PLKB4.1b3 | 39391308   | 17         | 46967043  | A  | G   |        | ENSMUSG00000036568 | BC032203      | p.Y21H        | Missense             |

|           |           |    |           |   |   |                        |                    |               |                               |                                          |
|-----------|-----------|----|-----------|---|---|------------------------|--------------------|---------------|-------------------------------|------------------------------------------|
| PLKB4.1b3 | 39391218  | 17 | 71346048  | A | C |                        | ENSMUSG00000024048 | Myl12a        | p.L58R                        | Missense                                 |
| PLKB4.1b3 | 39389076  | 18 | 50027491  | T | G |                        | ENSMUSG00000037416 | Dmxl1         | p.S801R                       | Missense                                 |
| PLKB4.1b3 | 39389526  | 19 | 13009906  | T | C |                        | ENSMUSG00000049498 | Olfrl449      | p.L226P                       | Missense                                 |
| PLKB4.1b3 | 39389428  | 19 | 34381769  | G | A |                        | ENSMUSG00000024778 | Fas           | c.184+1G>A                    | Essential splice                         |
| PLKB4.1b3 | 39397713  | X  | 11616062  | T | G |                        | ENSMUSG00000040363 | Bcor          | p.N1655T                      | Missense                                 |
| PLKB4.1b3 | 39397798  | X  | 109745527 | A | C |                        | ENSMUSG00000025529 | Zfp711        | p.K397Q                       | Missense                                 |
| PLKB4.1b3 | 39397909  | X  | 137077467 | C | T |                        | ENSMUSG00000031431 | Tsc22d3       | p.V14I                        | Missense                                 |
| PLKB4.1b4 | 39354888  | 1  | 19094468  | C | G |                        | ENSMUSG00000042596 | Tfap2d        | p.S21R                        | Missense                                 |
| PLKB4.1b4 | 39354787  | 1  | 26739735  | T | A |                        | ENSMUSG00000073722 | 4931408C20Rik | p.I1070F                      | Missense                                 |
| PLKB4.1b4 | 39354854  | 1  | 58351208  | G | A |                        | ENSMUSG00000079554 | Aox3l1        | p.A247T                       | Missense                                 |
| PLKB4.1b4 | 39354866  | 1  | 65306620  | G | A |                        | ENSMUSG00000025949 | Pikfyve       | p.E1574K                      | Missense                                 |
| PLKB4.1b4 | 39354243  | 1  | 82285966  | C | T |                        | ENSMUSG00000055980 | Irs1          | p.R368H                       | Missense                                 |
| PLKB4.1b4 | 39354088  | 1  | 109503526 | T | G |                        | ENSMUSG00000026315 | Serpinh8      | p.L250R                       | Missense                                 |
| PLKB4.1b4 | 39354128  | 1  | 174149628 | T | C |                        | ENSMUSG00000007122 | Casq1         | p.E59G                        | Missense                                 |
| PLKB4.1b4 | 39354710  | 1  | 191947259 | G | A |                        | ENSMUSG00000010175 | Prox1         | p.A685V                       | Missense                                 |
| PLKB4.1b4 | 39357681  | 2  | 34868531  | G | A |                        | ENSMUSG00000026874 | Hc            | p.A1076V                      | Missense                                 |
| PLKB4.1b4 | 39357684  | 2  | 36308487  | C | G |                        | ENSMUSG00000058803 | Olfrl340      | p.C127W                       | Missense                                 |
| PLKB4.1b4 | 39357701  | 2  | 40716207  | C | T |                        | ENSMUSG00000049252 | Lrp1b         | p.R3100H                      | Missense                                 |
| PLKB4.1b4 | 39358062  | 2  | 52578993  | T | G |                        | ENSMUSG00000055371 | Stam2         | p.K48N                        | Missense                                 |
| PLKB4.1b4 | 39358091  | 2  | 85681766  | A | C |                        | ENSMUSG00000075208 | Olfrl019      | p.F61V                        | Missense                                 |
| PLKB4.1b4 | 39358097  | 2  | 86263012  | C | T |                        | ENSMUSG00000078421 | Olfrl062      | p.A274T                       | Missense                                 |
| PLKB4.1b4 | 39358098  | 2  | 86349512  | T | G |                        | ENSMUSG00000060742 | Olfrl076      | p.Y299D                       | Missense                                 |
| PLKB4.1b4 | 39358099  | 2  | 86517195  | C | G |                        | ENSMUSG00000075175 | Olfrl086      | p.Q98H                        | Missense                                 |
| PLKB4.1b4 | 39357866  | 2  | 88586532  | A | G |                        | ENSMUSG00000075117 | Olfrl198      | p.I171T                       | Missense                                 |
| PLKB4.1b4 | 39357868  | 2  | 89246750  | G | A |                        | ENSMUSG00000075089 | Olfrl1238     | p.S162F                       | Missense                                 |
| PLKB4.1b4 | 39357812  | 2  | 110571699 | C | T |                        | ENSMUSG00000050808 | Muc15         | p.P108S                       | Missense                                 |
| PLKB4.1b4 | 153070869 | 2  | 127162366 |   |   | CTTGCGAGGT             | ENSMUSG00000027368 | Dusp2         | c.393_400+2del<br>CTTGCGAGGgt | Complex change in<br>transcript deletion |
| PLKB4.1b4 | 153070890 | 2  | 136372637 |   | G |                        | ENSMUSG00000074771 | Ankrd5        | p.G262fs*9                    | Frameshift deletion                      |
| PLKB4.1b4 | 39357934  | 2  | 164181231 | G | A |                        | ENSMUSG00000017002 | Sjpl1         | p.A68V                        | Missense                                 |
| PLKB4.1b4 | 39358012  | 2  | 174253467 | A | G |                        | ENSMUSG00000016256 | Ctsz          | p.M276T                       | Missense                                 |
| PLKB4.1b4 | 39353581  | 3  | 38856044  | G | C |                        | ENSMUSG00000046743 | Fat4          | p.V2124L                      | Missense                                 |
| PLKB4.1b4 | 39353594  | 3  | 61168181  | G | A |                        | ENSMUSG00000053706 | B430305J03Rik | p.H22Y                        | Missense                                 |
| PLKB4.1b4 | 39353617  | 3  | 72854701  | T | C |                        | ENSMUSG00000048304 | Slitrk3       | p.H220R                       | Missense                                 |
| PLKB4.1b4 | 153062489 | 3  | 93250445  |   |   | GGAGCAAGAG<br>CTCCGCAA | ENSMUSG00000052415 | Tchh          | p.E626_R627in<br>sQELRKE      | Frameshift insertion                     |
| PLKB4.1b4 | 39353758  | 3  | 97951233  | T | G |                        | ENSMUSG00000027878 | Notch2        | p.S2403A                      | Missense                                 |
| PLKB4.1b4 | 39355418  | 4  | 15831900  | G | A |                        | ENSMUSG00000028222 | Calb1         | p.G259E                       | Missense                                 |
| PLKB4.1b4 | 39355481  | 4  | 137834019 | C | T |                        | ENSMUSG00000028758 | Kif17         | p.R327C                       | Missense                                 |
| PLKB4.1b4 | 39357529  | 6  | 29559470  | G | a |                        | ENSMUSG00000012535 | Tnpo3         | p.P36S                        | Missense                                 |
| PLKB4.1b4 | 153061070 | 6  | 40195653  |   | G |                        | ENSMUSG00000057716 | Gm5567        | p.G103fs*6                    | Frameshift deletion                      |
| PLKB4.1b4 | 39357610  | 6  | 41721935  | T | C |                        | ENSMUSG00000045479 | Olfrl459      | p.D121G                       | Missense                                 |
| PLKB4.1b4 | 39357408  | 6  | 55228153  | A | G |                        | ENSMUSG00000038022 | Fam188b       | p.D511G                       | Missense                                 |
| PLKB4.1b4 | 39357416  | 6  | 56907279  | A | C |                        | ENSMUSG00000071893 | Vmn1r4        | p.D258A                       | Missense                                 |
| PLKB4.1b4 | 39357460  | 6  | 84064057  | G | A |                        | ENSMUSG00000033788 | Dysf          | p.R1060Q                      | Missense                                 |
| PLKB4.1b4 | 39357489  | 6  | 124682391 | T | C |                        | ENSMUSG00000004266 | Ptpn6         | p.I85V                        | Missense                                 |
| PLKB4.1b4 | 39357490  | 6  | 124682398 | C | A |                        | ENSMUSG00000004266 | Ptpn6         | p.Q82H                        | Missense                                 |
| PLKB4.1b4 | 153061479 | 6  | 125121921 |   | C |                        | ENSMUSG00000038252 | Ncapd2        | p.A976fs*4                    | Frameshift insertion                     |
| PLKB4.1b4 | 39357372  | 6  | 132907367 | T | A |                        | ENSMUSG00000057699 | Tas2r131      | p.K166*                       | Nonsense                                 |
| PLKB4.1b4 | 39358666  | 7  | 17740146  | G | T |                        | ENSMUSG00000053228 | Ceacam3       | p.E169*                       | Nonsense                                 |
| PLKB4.1b4 | 39358628  | 7  | 25917455  | A | C |                        | ENSMUSG00000008496 | Pou2f2        | p.M6R                         | Missense                                 |
| PLKB4.1b4 | 39358744  | 7  | 50915345  | C | T |                        | ENSMUSG00000030474 | Siglece       | p.R53K                        | Missense                                 |
| PLKB4.1b4 | 39358752  | 7  | 51784776  | C | A |                        | ENSMUSG00000008193 | Spib          | p.C100F                       | Missense                                 |
| PLKB4.1b4 | 39358753  | 7  | 51784853  | T | C |                        | ENSMUSG00000008193 | Spib          | p.N84D                        | Missense                                 |
| PLKB4.1b4 | 39359016  | 7  | 70244531  | C | T |                        | ENSMUSG00000030525 | Chrna7        | p.R363H                       | Missense                                 |
| PLKB4.1b4 | 39358860  | 7  | 137321263 | G | A |                        | ENSMUSG00000030849 | Fgfr2         | p.Q616*                       | Nonsense                                 |
| PLKB4.1b4 | 39352656  | 8  | 12713962  | G | A |                        | ENSMUSG00000074469 | Gm15348       | p.A17V                        | Missense                                 |
| PLKB4.1b4 | 39352665  | 8  | 14822586  | G | A |                        | ENSMUSG00000047495 | Dlgap2        | p.R689H                       | Missense                                 |
| PLKB4.1b4 | 39352607  | 8  | 28519809  | G | A |                        | ENSMUSG00000031491 | Chrna6        | p.R87C                        | Missense                                 |
| PLKB4.1b4 | 39352608  | 8  | 29872206  | T | A |                        | ENSMUSG00000063626 | Unc5d         | p.K237M                       | Missense                                 |
| PLKB4.1b4 | 39352720  | 8  | 53282407  | A | G |                        | ENSMUSG00000052825 | Gm9892        | p.S2P                         | Missense                                 |
| PLKB4.1b4 | 39352698  | 8  | 88164565  | T | C |                        | ENSMUSG00000036902 | Neto2         | p.Y511C                       | Missense                                 |
| PLKB4.1b4 | 153065841 | 8  | 111774830 |   | A |                        | ENSMUSG00000057387 | 4922502B01Rik | p.L201fs?                     | Frameshift deletion                      |
| PLKB4.1b4 | 39355541  | 9  | 36342022  | G | A |                        | ENSMUSG00000074448 | Gm5615        | p.H73Y                        | Missense                                 |
| PLKB4.1b4 | 39355553  | 9  | 38635654  | A | G |                        | ENSMUSG00000044798 | Olfrl923      | p.Y126C                       | Missense                                 |
| PLKB4.1b4 | 153066170 | 9  | 39509846  |   | G |                        | ENSMUSG00000062121 | Olfrl149      | p.D171fs*2                    | Frameshift deletion                      |
| PLKB4.1b4 | 39355677  | 9  | 53181593  | C | T |                        | ENSMUSG00000034584 | Exph5         | p.T623I                       | Missense                                 |
| PLKB4.1b4 | 39355518  | 9  | 73780833  | A | C |                        | ENSMUSG00000062151 | Unc13c        | p.L181R                       | Missense                                 |
| PLKB4.1b4 | 39355898  | 9  | 108016984 | T | G |                        | ENSMUSG00000032589 | Bsn           | p.Q1300P                      | Missense                                 |
| PLKB4.1b4 | 39353336  | 10 | 23720702  | G | T |                        | ENSMUSG00000069705 | Taar7b        | p.A320S                       | Missense                                 |
| PLKB4.1b4 | 39353340  | 10 | 26844287  | C | A |                        | ENSMUSG00000019899 | Lama2         | p.V1682F                      | Missense                                 |
| PLKB4.1b4 | 39353427  | 10 | 75296431  | C | T |                        | ENSMUSG00000033318 | Gstt2         | p.V56I                        | Missense                                 |
| PLKB4.1b4 | 39357030  | 11 | 48679814  | T | G |                        | ENSMUSG00000046879 | Irgm1         | p.D240A                       | Missense                                 |
| PLKB4.1b4 | 153067348 | 11 | 55086649  |   | C |                        | ENSMUSG00000055333 | Fat2          | p.G3094fs*8                   | Frameshift deletion                      |
| PLKB4.1b4 | 39356922  | 11 | 60310491  | G | A |                        | ENSMUSG00000042678 | Myo15         | p.R763H                       | Missense                                 |
| PLKB4.1b4 | 153067486 | 11 | 77728486  |   | G |                        | ENSMUSG00000055045 | Gm11190       | p.P41fs*23                    | Frameshift deletion                      |
| PLKB4.1b4 | 39356862  | 11 | 90499631  | T | G |                        | ENSMUSG00000020544 | Cox11         | p.L43R                        | Missense                                 |
| PLKB4.1b4 | 39356894  | 11 | 98338239  | A | T |                        | ENSMUSG00000018168 | Ikzf3         | c.823+2T>A                    | Essential splice                         |
| PLKB4.1b4 | 39356895  | 11 | 98338271  | G | A |                        | ENSMUSG00000018168 | Ikzf3         | p.R265*                       | Nonsense                                 |
| PLKB4.1b4 | 39354058  | 12 | 81211417  | C | T |                        | ENSMUSG00000021127 | Zfp361        | p.S59N                        | Missense                                 |
| PLKB4.1b4 | 39353147  | 13 | 23647205  | C | T |                        | ENSMUSG00000052565 | Hist1h1d      | p.L83F                        | Missense                                 |
| PLKB4.1b4 | 39353150  | 13 | 23647313  | C | T |                        | ENSMUSG00000052565 | Hist1h1d      | p.P119S                       | Missense                                 |
| PLKB4.1b4 | 39352848  | 14 | 102039652 | A | C |                        | ENSMUSG00000075486 | Comm6         | p.M1R                         | Missense                                 |
| PLKB4.1b4 | 39356712  | 15 | 80875717  | A | T |                        | ENSMUSG00000042292 | Mkl1          | c.112+2T>A                    | Essential splice                         |
| PLKB4.1b4 | 39356539  | 15 | 99611366  | C | T |                        | ENSMUSG00000023022 | Lima1         | p.A382T                       | Missense                                 |
| PLKB4.1b4 | 39356559  | 15 | 102260492 | A | T |                        | ENSMUSG00000001280 | Sp1           | p.H648L                       | Missense                                 |
| PLKB4.1b4 | 39356560  | 15 | 102260573 | A | G |                        | ENSMUSG00000001280 | Sp1           | p.K675R                       | Missense                                 |
| PLKB4.1b4 | 39354992  | 16 | 18252558  | G | A |                        | ENSMUSG00000022721 | Trm2a         | p.A464T                       | Missense                                 |

|           |           |   |    |           |   |   |   |                    |               |             |                      |
|-----------|-----------|---|----|-----------|---|---|---|--------------------|---------------|-------------|----------------------|
| PLKB4.1b4 | 39355040  |   | 16 | 19982838  | T | C |   | ENSMUSG00000043008 | Klh6          | p.E71G      | Missense             |
| PLKB4.1b4 | 39355041  |   | 16 | 19982853  | C | G |   | ENSMUSG00000043008 | Klh6          | p.C66S      | Missense             |
| PLKB4.1b4 | 39355042  |   | 16 | 19982869  | T | G |   | ENSMUSG00000043008 | Klh6          | p.T61P      | Missense             |
| PLKB4.1b4 | 39355078  |   | 16 | 45610678  | G | A |   | ENSMUSG00000022659 | Gcet2         | c.29+5G>A   | Essential splice     |
| PLKB4.1b4 | 153060833 |   | 17 | 12895130  |   |   | C | ENSMUSG00000023830 | Igf2r         | p.D1310fs*5 | Frameshift insertion |
| PLKB4.1b4 | 39358361  |   | 17 | 29098473  | A | C |   | ENSMUSG00000005936 | Kctd20        | p.E92A      | Missense             |
| PLKB4.1b4 | 39358382  |   | 17 | 29628477  | C | g |   | ENSMUSG00000024014 | Pim1          | p.H152D     | Missense             |
| PLKB4.1b4 | 39358391  |   | 17 | 29628981  | G | A |   | ENSMUSG00000024014 | Pim1          | c.859+5G>A  | Essential splice     |
| PLKB4.1b4 | 39358405  |   | 17 | 31740200  | C | T |   | ENSMUSG00000006705 | Pknox1        | p.T332M     | Missense             |
| PLKB4.1b4 | 39358166  |   | 17 | 34200375  | A | C |   | ENSMUSG00000024330 | Col11a2       | p.I1369L    | Missense             |
| PLKB4.1b4 | 39358411  |   | 17 | 35148237  | T | G |   | ENSMUSG00000007029 | Vars          | p.C478G     | Missense             |
| PLKB4.1b4 | 39358422  |   | 17 | 35332079  | A | G |   | ENSMUSG00000024399 | Ltb           | p.S83G      | Missense             |
| PLKB4.1b4 | 39358434  |   | 17 | 36462099  | C | T |   | ENSMUSG00000024448 | H2-M10.1      | p.A174T     | Missense             |
| PLKB4.1b4 | 39358468  |   | 17 | 46967012  | A | T |   | ENSMUSG00000036568 | BC032203      | c.90+2T>A   | Essential splice     |
| PLKB4.1b4 | 39358469  |   | 17 | 46967043  | A | G |   | ENSMUSG00000036568 | BC032203      | p.Y21H      | Missense             |
| PLKB4.1b4 | 39358198  |   | 17 | 71346048  | A | C |   | ENSMUSG00000024048 | Myl12a        | p.L58R      | Missense             |
| PLKB4.1b4 | 39357200  |   | 19 | 13009906  | T | C |   | ENSMUSG00000049498 | Olf1449       | p.L226P     | Missense             |
| PLKB4.1b4 | 39357271  |   | 19 | 34381769  | G | A |   | ENSMUSG00000024778 | Fas           | c.184+1G>A  | Essential splice     |
| PLKB4.1b4 | 153069356 |   | 19 | 53526131  |   |   | G | ENSMUSG00000025023 | 5830416P10Rik | p.F108fs?   | Frameshift deletion  |
| PLKB4.1b4 | 39352106  | X |    | 11616062  | T | G |   | ENSMUSG00000040363 | Bcor          | p.N1655T    | Missense             |
| PLKB4.1b4 | 39352171  | X |    | 109745527 | A | C |   | ENSMUSG00000025529 | Zfp711        | p.K397Q     | Missense             |
| PLKB4.1b4 | 39352109  | X |    | 153621716 | T | C |   | ENSMUSG00000057457 | Phex          | p.N633D     | Missense             |

Table S4. Validated mutations from animal PLKE5.1a

| Variant ID | Chromosome | Position  | WT | Mut | Change | Ensembl gene ID    | Gene name     | Description | Mutation Consequence |
|------------|------------|-----------|----|-----|--------|--------------------|---------------|-------------|----------------------|
| 39349870   | 1          | 92110418  | A  | G   |        | ENSMUSG00000044337 | Cxcr7         | p.Y8C       | Missense             |
| 153075987  | 1          | 120898675 |    |     | G      | ENSMUSG00000048402 | Gli2          | p.D27fs*15  | Frameshift deletion  |
| 39350731   | 2          | 64771379  | A  | C   |        | ENSMUSG00000026888 | Grb14         | p.H236Q     | Missense             |
| 39350737   | 2          | 66073240  | T  | A   |        | ENSMUSG00000034848 | Ttc21b        | p.I416L     | Missense             |
| 39350719   | 2          | 87586461  | T  | C   |        | ENSMUSG00000068817 | Olfir1140     | p.L36P      | Missense             |
| 39348525   | 3          | 38855777  | G  | A   |        | ENSMUSG00000046743 | Fat4          | p.A2035T    | Missense             |
| 39348654   | 3          | 145661547 | G  | A   |        | ENSMUSG00000036863 | Syde2         | p.R212H     | Missense             |
| 39346917   | 5          | 20809027  | T  | A   |        | ENSMUSG00000064280 | Ccdc146       | p.T614S     | Missense             |
| 39347126   | 5          | 136235040 | A  | G   |        | ENSMUSG00000019178 | Styx11        | p.Y2H       | Missense             |
| 39346554   | 6          | 42306507  | A  | G   |        | ENSMUSG00000029860 | Zyx           | p.H456R     | Missense             |
| 39346461   | 6          | 57159903  | G  | A   |        | ENSMUSG00000064259 | Vmn1r13       | p.A18T      | Missense             |
| 39346512   | 6          | 77193796  | C  | T   |        | ENSMUSG00000060780 | Lrrtm1        | p.R81C      | Missense             |
| 39346350   | 6          | 139991012 | T  | C   |        | ENSMUSG00000041791 | Capza3        | p.I272T     | Missense             |
| 39347964   | 7          | 28261330  | G  | A   |        | ENSMUSG00000055200 | Sertad3       | p.V57I      | Missense             |
| 39351106   | 8          | 18788375  | G  | T   |        | ENSMUSG00000039842 | Mcph1         | p.G771V     | Missense             |
| 39347512   | 9          | 108740842 | C  | T   |        | ENSMUSG00000023473 | Celsr3        | p.P2129S    | Missense             |
| 39347214   | 9          | 123765473 | A  | T   |        | ENSMUSG00000060509 | Xcr1          | p.F99Y      | Missense             |
| 39346092   | 12         | 47917880  | A  | C   |        | ENSMUSG00000021047 | Nova1         | p.F91L      | Missense             |
| 39346268   | 12         | 83442115  | A  | C   |        | ENSMUSG00000042700 | Sipa111       | p.N43H      | Missense             |
| 39348937   | 14         | 98418095  | A  | G   |        | ENSMUSG00000055639 | Dach1         | c.943+2T>C  | Essential splice     |
| 153073592  | 16         | 19953672  |    |     | C      | ENSMUSG00000043008 | Kihl6         | p.D330fs*19 | Frameshift insertion |
| 39347594   | 16         | 23113249  | A  | T   |        | ENSMUSG00000022884 | Eif4a2        | p.R363S     | Missense             |
| 39347599   | 16         | 30354371  | T  | A   |        | ENSMUSG00000022533 | Atp13a3       | p.D258V     | Missense             |
| 39348310   | 18         | 7871607   | C  | T   |        | ENSMUSG00000024283 | Wac           | p.R47*      | Nonsense             |
| 39348486   | 19         | 4265302   | T  | C   |        | ENSMUSG00000034616 | Ssh3          | p.H332R     | Missense             |
| 39348462   | 19         | 34389717  | G  | A   |        | ENSMUSG00000024778 | Fas           | p.C78Y      | Missense             |
| 39351739   | X          | 17996070  | A  | G   |        | ENSMUSG00000037358 | 4930578C19Rik | p.Y424H     | Missense             |
| 39351859   | X          | 81557853  | T  | A   |        | ENSMUSG00000045103 | Dmd           | p.L2267Q    | Missense             |

Table S5. Genotyping primers

| cDNA           | Forward primer (cDNA)       | Reverse primer (tag sequence) |
|----------------|-----------------------------|-------------------------------|
| CDK2           | GCCTAGCTTTCTGCCATTCTCAT     | CATATCGAATACTAGCGGCGC         |
| CDK2.P45L      | GCCTAGCTTTCTGCCATTCTCAT     | AACGGGCGGTATCTGCTCC           |
| DGKB           | TGGAGGTGGTCGGCTTGAAGGAGC    | CTCAGTCCTGCTTAACAAGTGACGCA    |
| DGKB.D592Y     | TGGAGGTGGTCGGCTTGAAGGAGC    | CGTTAATCTAGCCGATAAACTTAGTAG   |
| DGKB.G501S     | TGGAGGTGGTCGGCTTGAAGGAGC    | GCGGATGCGCAGATCCCGTCGCGGAC    |
| DGKB.K704E     | TGGAGGTGGTCGGCTTGAAGGAGC    | ATTAACCTCGCCGTGACTGCGTCCAATG  |
| DGKB.M111I     | TGGAGGTGGTCGGCTTGAAGGAGC    | CTGCGGAATGCTTATCACGCGGATAAG   |
| DGKB.P432S     | TGGAGGTGGTCGGCTTGAAGGAGC    | CGTAGCTGCTATCGCGTACCGAAAAGC   |
| ERN1           | CTTCCAGGACGTGAGCGACAG       | ATTGATGGCAGGCCGCG             |
| ERN1.S768F     | CTTCCAGGACGTGAGCGACAG       | TGTCAGGCGTACTAGCCGTCTC        |
| HCK            | GTCAAACCTTCATGCGGTGGTCA     | CGCAATGTACCGAACTAGCAGC        |
| HCK.D378G      | GTCAAACCTTCATGCGGTGGTCA     | CGGTAGTGAGCGAATGCTGTC         |
| ITK            | AAAGCATTATCACATCAAGGAAACA   | GAGGATACGGAACACTTAGCCACTG     |
| ITK.P23L       | AAAGCATTATCACATCAAGGAAACA   | TTGCGTGGATCTCGATACCTATTC      |
| LYN            | GTTTGGGGAAGTCTGGATGG        | CATTGTCATCGTGTACGCTCGTC       |
| LYN.D385Y      | GTTTGGGGAAGTCTGGATGG        | AACCGACTTAGTACCGATTCAATCA     |
| MAPK8          | GGCATGGGCTACAAGGAAAAC       | GCTCGCTTCATACTGATTCCGTA       |
| MAPK8.G171S    | GGCATGGGCTACAAGGAAAAC       | CGGGTCTACTGTATAGCGCGTTAG      |
| MAPK8.G177R    | GGCATGGGCTACAAGGAAAAC       | ATAACCGAAAGTCGCGTAAGCG        |
| MAPK9          | CAAAATAAAAAACAAGTCAAGCCAGAG | TATCTGTGTACCGCGTAATGGC        |
| MAPK9.K56N     | CAAAATAAAAAACAAGTCAAGCCAGAG | CGATAGATAGTGCGAAGGATGTGATA    |
| MAPK9.V13M     | CAAAATAAAAAACAAGTCAAGCCAGAG | ATTATTGTCACTGCGGCGAGG         |
| MGC42105       | GAAGCACATGCATGAAAACCAA      | CAGTCTTCGGTATAGTTACGAGTGCA    |
| MGC42105.P411T | GAAGCACATGCATGAAAACCAA      | GCGGGTTTGATTAAGCCTCG          |
| NTRK3          | TGAAGCATGGAGACCTGAATAAGT    | TTGTGCGTATGCCCTGATCGT         |
| NTRK3.H677Y    | TGAAGCATGGAGACCTGAATAAGT    | ATTTTCGTTGCTTTTCGCGC          |
| NTRK3.R678Q    | TGAAGCATGGAGACCTGAATAAGT    | GGTCGGCTGCACGCTAAATAG         |
| p53.R270H      | CACGTA CTCTCCTCCCCTCAATAA   | CAAACGATGTCCACCATGATAATATC    |
| YSK4           | TCTGGCTATGGACGGAATCA        | AAACCGCATTAGCTCTTATACGAAGT    |
| YSK4.E512V     | TCTGGCTATGGACGGAATCA        | TAACATAACGTGCCGATGGGTAC       |
